# Supplementary material for: Sodium or Not Sodium: Should Its Presence Affect the Accuracy of Pose Prediction in Docking GPCR Antagonists?
Source: MDPI journal article supplement (doi:10.3390/ph15030346), 2022-03-11
Supplement: s1 [file s1]

**Table S1.** Complete list of all the 118 GPCR-antagonist complexes used for this study. For each system, the class A subfamily, the PDB code, the encoding gene, and the presence of the allosteric sodium ion in the structure are annotated.

| GPCR Subfamily | PDB code | GPCR receptor gene | Na <sup>+</sup> crystallized |
|----------------|----------|--------------------|------------------------------|
| A01            | 4MBS     | CCR5               | NO                           |
| A01            | 6AKX     | CCR5               | NO                           |
| A01            | 6AKY     | CCR5               | NO                           |
| A02            | 30DU     | CXCR4              | NO                           |
| A03            | 4YAY     | AGTRL1             | NO                           |
| A03            | 4ZUD     | AGTRL1             | NO                           |
| A04            | 4DJH     | OPRK1              | NO                           |
| A04            | 4N6H     | OPRM1              | YES                          |
| A05            | 4EA3     | OPRL1              | NO                           |
| A05            | 5DHG     | OPRL1              | NO                           |
| A05            | 5DHH     | OPRL1              | NO                           |
| A05            | 6RZ4     | CYSLTR1            | YES                          |
| A05            | 6RZ5     | CYSLTR1            | YES                          |
| A05            | 6RZ7     | CYSLTR2            | NO                           |
| A05            | 6RZ8     | CYSLTR2            | NO                           |
| A05            | 6RZ9     | CYSLTR2            | NO                           |
| A05            | 7K15     | LTB4R              | YES                          |
| A06            | 4S0V     | HCRTR2             | NO                           |
| A06            | 4ZJ8     | HCRTR1             | NO                           |
| A06            | 4ZJC     | HCRTR1             | NO                           |
| A06            | 5WQC     | HCRTR2             | NO                           |
| A06            | 6TO7     | HCRTR1             | YES                          |
| A06            | 6TOD     | HCRTR1             | YES                          |
| A06            | 6TOS     | HCRTR1             | YES                          |
| A06            | 6TOT     | HCRTR1             | NO                           |
| A06            | 6TP3     | HCRTR1             | NO                           |
| A06            | 6TP4     | HCRTR1             | NO                           |
| A06            | 6TP6     | HCRTR1             | NO                           |
| A06            | 6TPN     | CCKBR              | NO                           |
| A06            | 6TQ4     | HCRTR1             | YES                          |
| A06            | 6TQ6     | HCRTR1             | NO                           |
| A06            | 6TQ7     | HCRTR1             | NO                           |
| A06            | 6TQ9     | HCRTR1             | NO                           |
| A06            | 6V9S     | HCRTR1             | NO                           |
| A06            | 7F8U     | CCKAR              | NO                           |
| A06            | 7F8Y     | CCKAR              | NO                           |
| A07            | 5X93     | EDNRB              | NO                           |
| A07            | 5XPR     | EDNRB              | NO                           |
| A07            | 6K1Q     | EDNRB              | NO                           |
| A07            | 7F83     | GHSR               | NO                           |
| A09            | 5ZBH     | NPY1R              | NO                           |
| A09            | 5ZBQ     | NPY1R              | NO                           |
| A09            | 6E59     | TACR1              | NO                           |
| A09            | 6HLL     | TACR1              | NO                           |
| A09            | 6HLO     | TACR1              | NO                           |
| A09            | 6HLP     | TACR1              | NO                           |
| A09            | 7DDZ     | NPY2R              | NO                           |
| A11            | 4XNW     | P2RY1              | NO                           |

|     |      |         |                                   |
|-----|------|---------|-----------------------------------|
| A12 | 4NTJ | P2RY1   | NO                                |
| A12 | 5ZKP | PTAFR   | NO                                |
| A13 | 3V2Y | S1PR1   | NO                                |
| A13 | 4Z34 | LPAR1   | NO                                |
| A13 | 4Z35 | LPAR1   | NO                                |
| A13 | 4Z36 | LPAR1   | NO                                |
| A13 | 5TGZ | CNR1    | NO                                |
| A13 | 5U09 | CNR1    | NO                                |
| A13 | 5ZTY | CNR2    | NO                                |
| A14 | 5YHL | PTGER2  | NO                                |
| A14 | 5YWY | PTGER2  | NO                                |
| A14 | 6D26 | PTGDR2  | NO                                |
| A14 | 6D27 | PTGDR2  | NO                                |
| A14 | 6IIU | TBXA2R  | NO                                |
| A14 | 6IIV | TBXA2R  | NO                                |
| A15 | 3VW7 | F2R     | YES                               |
| A15 | 5NDD | F2RL1   | YES                               |
| A17 | 2RH1 | ADRB2   | NO                                |
| A17 | 3D4S | ADRB2   | NO                                |
| A17 | 3NY9 | ADRB2   | NO                                |
| A17 | 3PBL | DRD2    | NO                                |
| A17 | 6A93 | HTR2A   | NO                                |
| A17 | 6A94 | HTR2A   | NO                                |
| A17 | 6CM4 | DRD2    | NO                                |
| A17 | 6DRX | HTR2B   | NO                                |
| A17 | 6DRZ | HTR2B   | NO                                |
| A17 | 6DS0 | HTR2B   | NO                                |
| A17 | 6E67 | ADRB2   | NO                                |
| A17 | 6IQL | DRD4    | NO                                |
| A17 | 6KUX | ADRA2A  | NO                                |
| A17 | 6LUQ | DRD2    | NO                                |
| A17 | 6PS2 | ADRB2   | NO                                |
| A17 | 6PS3 | ADRB2   | NO                                |
| A17 | 6PS4 | ADRB2   | NO                                |
| A17 | 6PS5 | ADRB2   | NO                                |
| A17 | 6PS6 | ADRB2   | NO                                |
| A17 | 6WH4 | HTR2A   | NO                                |
| A17 | 7B6W | ADRA1B  | NO                                |
| A17 | 7BVQ | ADRB1   | NO (not in the allosteric pocket) |
| A17 | 7DFP | DRD2    | NO                                |
| A17 | 7VOD | HTR2A   | NO                                |
| A17 | 7VOE | HTR2A   | NO                                |
| A18 | 3REY | ADORA2A | NO                                |
| A18 | 3RZE | HRH1    | NO                                |
| A18 | 3UZA | ADORA2A | NO                                |
| A18 | 5CXV | CHRM1   | NO                                |
| A18 | 5DSG | CHRM4   | NO                                |
| A18 | 5IU7 | ADORA2A | YES                               |
| A18 | 5IU8 | ADORA2A | YES                               |
| A18 | 5IUA | ADORA2A | YES                               |
| A18 | 5IUB | ADORA2A | YES                               |

|     |      |         |     |
|-----|------|---------|-----|
| A18 | 5MZJ | ADORA2A | YES |
| A18 | 5MZP | ADORA2A | YES |
| A18 | 5N2S | ADORA1  | NO  |
| A18 | 5OLH | ADORA2A | YES |
| A18 | 5OLO | ADORA2A | YES |
| A18 | 5OLV | ADORA2A | YES |
| A18 | 5OLZ | ADORA2A | YES |
| A18 | 5UIG | ADORA2A | NO  |
| A18 | 5ZK3 | CHRM2   | NO  |
| A18 | 5ZKB | CHRM2   | NO  |
| A18 | 5ZKC | CHRM2   | NO  |
| A18 | 6GT3 | ADORA2A | YES |
| A18 | 6LPJ | ADORA2A | YES |
| A18 | 6OL9 | CHRM5   | NO  |
| A18 | 6WQA | ADORA2A | YES |
| A18 | 6ZDR | ADORA2A | YES |
| A18 | 6ZDV | ADORA2A | YES |
| A18 | 7ARO | ADORA2A | YES |
| A19 | 5V54 | HTR1B   | NO  |

**Table S2.** Table showing the results of the self-docking calculations executed without considering the sodium ion during the calculations. This chart represents exclusively the 26 GPCR-antagonist complexes in which the sodium ion is present in the crystal structure.

| Self-docking results – Na <sup>+</sup> and H <sub>2</sub> O not considered – data representing only the 26 complexes having the sodium ion crystallized |                  |                    |                 |
|---------------------------------------------------------------------------------------------------------------------------------------------------------|------------------|--------------------|-----------------|
|                                                                                                                                                         | RMSD_average (Å) | RMSD_scor_func (Å) | RMSD_sorted (Å) |
| GOLD-goldscore                                                                                                                                          | 2.38             | 2.27               | 1.36            |
| GOLD-chemscore                                                                                                                                          | 3.77             | 3.27               | 2.37            |
| GOLD-asp                                                                                                                                                | 2.88             | 2.30               | 1.95            |
| GOLD-plp                                                                                                                                                | 3.77             | 2.82               | 2.17            |
| Glide-SP                                                                                                                                                | 3.64             | 2.31               | 1.61            |
| Glide-XP                                                                                                                                                | 2.31             | 2.28               | 1.48            |
| PLANTS <sub>CHEMPLP</sub>                                                                                                                               | 4.14             | 1.26               | 0.96            |
| PLANTS <sub>PLP</sub>                                                                                                                                   | 4.66             | 1.86               | 1.26            |
| <b>All the molecular docking experiments</b>                                                                                                            | <b>3.44</b>      | <b>2.30</b>        | <b>1.64</b>     |

**Table S3.** Table showing the results of the self-docking calculations executed taking into account the sodium ion and the water molecules at 4 Å or nearer to it. This chart represents exclusively the 26 GPCR-antagonist complexes in which the sodium ion is present in the crystal structure.

| Self-docking results – Na <sup>+</sup> and H <sub>2</sub> O placed at 4 Å or nearer to it both considered – data representing only the 26 complexes having the sodium ion crystallized |                  |                    |                 |
|----------------------------------------------------------------------------------------------------------------------------------------------------------------------------------------|------------------|--------------------|-----------------|
|                                                                                                                                                                                        | RMSD_average (Å) | RMSD_scor_func (Å) | RMSD_sorted (Å) |
| GOLD-goldscore                                                                                                                                                                         | 2.69             | 2.80               | 1.16            |
| GOLD-chemscore                                                                                                                                                                         | 3.75             | 3.34               | 2.48            |
| GOLD-asp                                                                                                                                                                               | 3.00             | 2.85               | 2.07            |
| GOLD-plp                                                                                                                                                                               | 3.21             | 1.85               | 1.77            |
| Glide-SP                                                                                                                                                                               | 4.09             | 1.62               | 1.12            |
| Glide-XP                                                                                                                                                                               | 1.58             | 1.56               | 1.11            |
| PLANTS <sub>CHEMPLP</sub>                                                                                                                                                              | 4.40             | 1.99               | 1.12            |
| PLANTS <sub>PLP</sub>                                                                                                                                                                  | 4.52             | 2.18               | 1.23            |
| <b>All the molecular docking experiments</b>                                                                                                                                           | <b>3.41</b>      | <b>2.27</b>        | <b>1.51</b>     |

**Table S4.** Table showing the results of the self-docking calculations executed without considering the sodium ion during the calculations. This chart represents exclusively the 92 GPCR-antagonist complexes in which the sodium ion is not present in the crystal structure.

| Self-docking results – Na <sup>+</sup> and H <sub>2</sub> O not considered – data representing only the 92 complexes that don't have the sodium ion crystallized |                  |                    |                 |
|------------------------------------------------------------------------------------------------------------------------------------------------------------------|------------------|--------------------|-----------------|
|                                                                                                                                                                  | RMSD_average (Å) | RMSD_scor_func (Å) | RMSD_sorted (Å) |
| GOLD-goldscore                                                                                                                                                   | 3.95             | 2.99               | 2.01            |
| GOLD-chemscore                                                                                                                                                   | 4.65             | 3.34               | 2.49            |
| GOLD-asp                                                                                                                                                         | 4.15             | 3.08               | 2.19            |
| GOLD-plp                                                                                                                                                         | 4.84             | 3.67               | 2.67            |
| Glide-SP                                                                                                                                                         | 4.31             | 2.64               | 1.77            |
| Glide-XP                                                                                                                                                         | 2.77             | 2.51               | 2.00            |
| PLANTS <sub>CHEMPLP</sub>                                                                                                                                        | 5.18             | 2.36               | 1.46            |
| PLANTS <sub>PLP</sub>                                                                                                                                            | 5.32             | 2.78               | 1.63            |
| <b>All the molecular docking experiments</b>                                                                                                                     | <b>4.40</b>      | <b>2.92</b>        | <b>2.03</b>     |

**Table S5.** Table showing the results of the self-docking calculations executed taking into account the sodium ion and the water molecules at 4 Å or nearer to it. This chart represents exclusively the 92 GPCR-antagonist complexes in which the sodium ion is not present in the crystal structure.

| Self-docking results – Na <sup>+</sup> and H <sub>2</sub> O placed at 4 Å or nearer to it both considered - data representing only the 92 complexes that don't have the sodium ion crystallized |                  |                    |                 |
|-------------------------------------------------------------------------------------------------------------------------------------------------------------------------------------------------|------------------|--------------------|-----------------|
|                                                                                                                                                                                                 | RMSD_average (Å) | RMSD_scor_func (Å) | RMSD_sorted (Å) |
| GOLD-goldscore                                                                                                                                                                                  | 4.46             | 4.25               | 2.66            |
| GOLD-chemscore                                                                                                                                                                                  | 4.76             | 4.06               | 2.92            |
| GOLD-asp                                                                                                                                                                                        | 4.45             | 3.37               | 2.50            |
| GOLD-plp                                                                                                                                                                                        | 4.89             | 3.98               | 2.78            |
| Glide-SP                                                                                                                                                                                        | 4.49             | 2.81               | 1.82            |
| Glide-XP                                                                                                                                                                                        | 3.15             | 2.91               | 2.12            |
| PLANTS <sub>CHEMPLP</sub>                                                                                                                                                                       | 5.36             | 2.77               | 1.60            |
| PLANTS <sub>PLP</sub>                                                                                                                                                                           | 5.32             | 2.92               | 1.73            |
| <b>All the molecular docking experiments</b>                                                                                                                                                    | <b>4.61</b>      | <b>3.38</b>        | <b>2.27</b>     |
